# Supplementary material for: Targeting Glioblastoma-Associated Macrophages for Photodynamic Therapy Using AGuIX®-Design Nanoparticles
Source: MDPI journal article supplement (doi:10.3390/pharmaceutics15030997), 2023-03-20
Supplement: s1 [file s1]

## Supplementary Data :

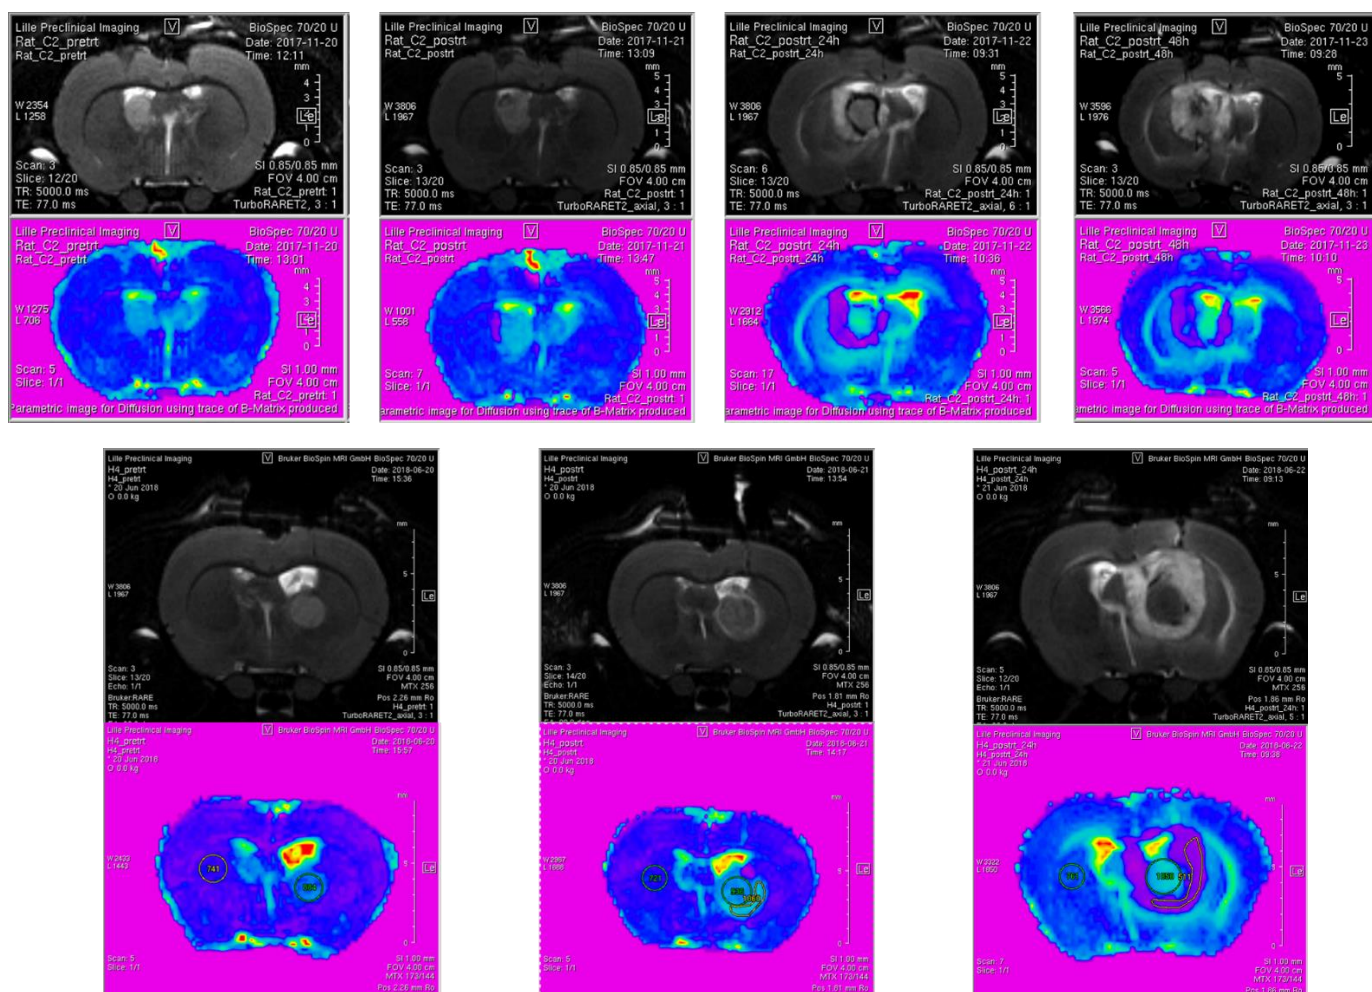

**Figure S1.** Two other rats treated by PDT after intravenous injection of AGuIX@PS@KDKPPR nanoparticles ( $1.75 \mu\text{mol.kg}^{-1}$  porphyrin equivalent) and followed by MRI analysis *via* T2 anatomical and diffusion (DWI - Diffusion Weighted Imaging) sequences.
